# Supplementary material
Source: publisher site journal article supplement (https://www.dovepress.com/article/456894)
Supplement: Supplementary file 1 [file get_supplementary_file.php]

**Supplemental Materials**

**Table A.** Prevalence ratios of affirmative SIQ responses by sex among adults aged 65 and older, controlling for age

| **OUTCOMES** | **Prevalence Ratio†**  **(95% CI)** |
| --- | --- |
| **At risk for falls (SIQ ≥4) (Yes)** | 1.14(1.13,1.16) ******* |
| **SIQ item (responding “Yes”)** |  |
| Q1. Fall in last year | 1.11(1.09,1.13) ******* |
| Q1a. >1 fall in last year | 1.16(1.14,1.18) ******* |
| Q1b. Fall with injury | 1.22(1.18,1.24) ******* |
| Q2. Feel unsteady | 0.82(0.80,0.84) ******* |
| Q3. Worried about falling | 0.78(0.76,0.79) ******* |
| Q4. Use or advised to use cane or walker | 1.02(1.00,1.04) * |
| Q5. Steady self on furniture | 1.02(1.00,1.04) * |
| Q6. Need to use hands to stand up from chair | 0.94(0.93,0.95) ******* |
| Q7. Trouble stepping up onto curb | 0.85(0.83,0.86) ******* |
| Q8. Often need to rush to toilet | 0.80(0.79,0.82) ******* |
| Q9. Lost feeling in feet | 1.29(1.27,1.32) ******* |
| Q10. Takes medicine causing light-headedness or tiredness | 1.03(1.00,1.06) * |
| Q11. Takes medicine for sleep or mood | 0.84(0.82,0.86) ******* |
| Q12. Often feel sad or depressed | 0.79(0.77,0.82) ******* |

Note: Adults with an unknown race are excluded from this analysis.

**†** Female is the reference group.

**††** At Risk is based on Stay Independent Questionnaire SIQ ≥ 4.

**†††** A ***SIQ* *Score*** was considered complete, and designated by meeting *one* of the following two criteria:

-All three SIQ screener responses were complete (Q1, Q2, Q3) and their sum was 0, with no missing values, and there were no responses

to Q4-12 *or*

-All three SIQ screener responses were complete, their sum was greater than 0, and all 12 SIQ questions had a non-missing response.

******p<0.05* *********p<0.01* **********p<0.001;* CI=confidence interval.

**Table B**. Prevalence ratios of affirmative SIQ responses by clinic location among adults aged 65 and older, controlling for age

| **OUTCOMES** | **Prevalence Ratio†**  **(95% CI)** |
| --- | --- |
| **At risk for falls (SIQ ≥4) (Yes)** | 0.97(0.95,0.99) ****** |
| **SIQ item (responding “Yes”)** |  |
| Q1. Fall in last year | 1.00(0.97,1.03) |
| Q1a. >1 fall in last year | 1.00(0.87,1.03) |
| Q1b. Fall with injury | 0.99(0.96,1.02) |
| Q2. Feel unsteady | 0.97(0.95,0.99) ****** |
| Q3. Worried about falling | 1.00(0.98,1.03) |
| Q4. Use or advised to use cane or walker | 1.04(1.01,1.07) ** |
| Q5. Steady self on furniture | 1.01(0.98,1.03) |
| Q6. Need to use hands to stand up from chair | 0.99(0.97,1.01) |
| Q7. Trouble stepping up onto curb | 1.01(0.99,1.04) |
| Q8. Often need to rush to toilet | 1.04(1.01,1.08) ****** |
| Q9. Lost feeling in feet | 1.00(0.96,1.03) |
| Q10. Takes medicine causing light-headedness or tiredness | 1.02(0.97,1.06) |
| Q11. Takes medicine for sleep or mood | 1.00(0.97,1.03) |
| Q12. Often feel sad or depressed | 1.08(1.03,1.13) ****** |

Note: Adults with an unknown race are excluded from this analysis.

**†**Urban is the reference group.

**††** At Risk is based on Stay Independent Questionnaire SIQ ≥ 4.

**†††** A ***SIQ* *Score*** was considered complete, and designated by meeting *one* of the following two criteria:

-All three SIQ screener responses were complete (Q1, Q2, Q3) and their sum was 0, with no missing values, and there were no responses

to Q4-12 *or*

-All three SIQ screener responses were complete, their sum was greater than 0, and all 12 SIQ questions had a non-missing response.

******p<0.05* *********p<0.01* **********p<0.001;* CI=confidence interval.

**Table C**. Prevalence ratios of affirmative SIQ responses by race among patients aged 65 and older, controlling for age

|  |  | | ***Prevalence Ratio*†**  ***(95% CI)*** | | | | | |
| --- | --- | --- | --- | --- | --- | --- | --- | --- |
| **OUTCOMES** | | **AAI** | | **ASN** | **BLK** | **HIS** | **NHP** | **OHR** |
| **At risk for falls (SIQ ≥4) (Yes)** | | 1.15(1.05,1.25) ****** | | 0.89(0.83,0.94) ******* | 1.11 (1.03,1.19) *** | 1.05(0.99,1.12) | 1.29(1.14,1.46) ******* | 0.97(0.90,1.05) |
| **SIQ question (responding “Yes”)** | |  | |  |  |  |  |  |
| Q1. Fall in last year | | 1.20(1.09,1.31) ******* | | 0.72(0.68,0.76) ******* | 0.92 (0.86,0.98) ***** | 0.97(0.92,1.01) | 1.05(0.90,1.22) | 0.85(0.80,0.91) ******* |
| Q1a. >1 fall in last year | | 1.05(0.92,1.18) | | 1.05(0.99,1.11) | 0.89 (0.81,0.98) ***** | 0.85(0.66,1.09) | 1.07(1.01,1.12) ***** | 0.96(0.86,1.04) |
| Q1b. Fall with injury | | 1.03(0.92,1.16) | | 1.03(0.98,1.10) | 0.87(0.80,0.96) ** | 1.08(1.03,1.13) *** | 0.82(0.65,1.04) | 0.98(0.91,1.05) |
| Q2. Feel unsteady | | 1.06(0.98,1.15) | | 0.84(0.80,0.87) *** | 1.03(0.98,1.09) | 0.95(0.92,0.99) ****** | 1.31(1.18,1.46) *** | 0.87(0.82,0.92) *** |
| Q3. Worried about falling | | 1.11 (1.02,1.22) ***** | | 1.02(0.98,1.06) | 0.98(0.92,1.05) | 1.10(1.06,1.14) ******* | 1.37(1.23,1.52) ******* | 0.98(0.93,1.04) |
| Q4. Use or advised to use cane or walker | | 1.22(1.14,1.32) ******* | | 1.04(0.99,1.08) | 1.33(1.29,1.38) ******* | 1.17(1.13,1.22) *** | 1.17(1.03,1.35) ***** | 1.07(1.01,1.14) ***** |
| Q5. Steady self on furniture | | 1.12(1.02,1.22) * | | 1.00(0.96,1.04) | 1.15(1.09,1.21) ******* | 1.11(1.07,1.15) *** | 1.20(1.07,1.36) ****** | 1.11(1.05,1.17) ******* |
| Q6. Need to use hands to stand up from chair | | 1.08(1.02,1.15) * | | 0.95(0.92,0.99) ** | 1.16(1.12,1.20) ******* | 1.07(1.05,1.10) *** | 1.08(0.98,1.20) | 1.01(0.97,1.06) |
| Q7. Trouble stepping up onto curb | | 1.17(1.07,1.27) ******* | | 1.10(1.06,1.14) ******* | 1.24(1.19,1.31) ******* | 1.20(1.16,1.24) *** | 1.19(1.05,1.34) ****** | 1.10(1.04,1.16) ******* |
| Q8. Often need to rush to toilet | | 1.10(0.98,1.23) | | 0.89(0.84,0.94) ******* | 1.20(1.12,1.28) ******* | 0.93(0.88,0.98) ** | 0.95(0.79,1.15) | 1.02 (0.95,1.09) |
| Q9. Lost feeling in feet | | 1.15(1.02,1.30) ***** | | 0.78(0.73,0.84) ******* | 1.07(0.98,1.16) | 0.91(0.85,0.96) ** | 1.09(0.91,1.31) | 0.95(0.87,1.03) |
| Q10. Takes medicine causing light-headedness or  tiredness | | 1.08(0.91,1.27) | | 0.88(0.81,0.95) ****** | 1.14(1.01,1.23) ***** | 1.01(0.96,1.09) | 1.12(0.89,1.41) | 1.06(0.96,1.16) |
| Q11. Takes medicine for sleep or mood | | 0.92(0.81,1.06) | | 0.57(0.52,0.61) ******* | 0.71(0.64,0.79) ******* | 0.74(0.69,0.79) ******* | 0.69(0.55,0.88) ****** | 0.83(0.77,0.91) ******* |
| Q12. Often feel sad or depressed | | 1.28 (1.09,1.50) ****** | | 0.98(0.90,1.06) | 1.10(0.99,1.23) | 1.25(1.18,1.34) *** | 0.77(0.57,1.05) | 1.26(1.15,1.39) ******* |

Note: Adults with an unknown race are excluded from this analysis. AAI=Native American, Alaska Native; ASN=Asian; BLK=Black; HIS=Hispanic; NHP=Native Hawaiian, Pacific Islander; OHR=Other;

†White is the reference group.

**††** At Risk is based on Stay Independent Questionnaire SIQ ≥ 4.

**†††** A ***SIQ* *Score*** was considered complete, and designated by meeting *one* of the following two criteria:

-All three SIQ screener responses were complete (Q1, Q2, Q3) and their sum was 0, with no missing values, and there were no responses

to Q4-12 *or*

-All three SIQ screener responses were complete, their sum was greater than 0, and all 12 SIQ questions had a non-missing response.

******p<0.05* *********p<0.01* **********p<0.001;* CI=confidence interval.
